# Supplementary material for: A decision tree model to predict liver cirrhosis in hepatocellular carcinoma patients: a retrospective study
Source: PeerJ. 2023 Aug 24;11:e15950. doi: 10.7717/peerj.15950 (PMC10460570; doi:10.7717/peerj.15950)
Supplement: Supplemental Information 5 — All clinical data of included patients. [file peerj-11-15950-s005.xlsx]

## Sheet: 240 cases
	Basic demographics			Pathology parameter	Laboratory findings																				Inflammatory markers									Serum fibrosis tests			Imaging features
	Age	Sex	BMI	S	HbsAg	HCVAb	ALBI	ALBI grade	AFP	DCP	RDW	NE	LYM	M	PLT	ALT	AST	GGT	Total Bilirubin	Albumin	CRP	PT	INR	INR group	GLR	PNI	ALRI	ANRI	SII	NLR	PLR	LMR	SIRI	APRI	FIB-4	GPR	Tumor Number	Tumor Size	Tumor Size Group	Cirrhosis
1	51	1	19.72	1-2	1	0	-2.65954	1	782.5	733.46	12.3	3	2.2	0.7	177	16.6	14.1	20.7	18.9	41.2	3.7	11.2	0.98	1	9.40909	52.2	6.40909	4.7	241.364	1.36364	80.4545	3.14286	0.954545	0.199153	0.997153	0.116949	0	4.1*2.5	1	0
2	58	1	24.22	3	1	0	-2.63041	1	123.8	27.12	11.9	2.7	1.2	0.3	164	49.4	35.1	74.2	22.2	41.4	5	11.5	1.01	2	61.8333	47.4	29.25	13	369	2.25	136.667	4	0.675	0.535061	1.76615	0.452439	1	2.8*3.5	1	1
3	66	2	21.48	3	1	0	-2.18974	2	439.9	16596.2	12.1	3.4	0.8	0.4	103	56.6	55.1	47.8	26.4	36.8	40.7	12.2	1.07	2	59.75	40.8	68.875	16.2059	437.75	4.25	128.75	2	1.7	1.33738	4.693	0.464078	0	12.1*7.4	2	1
4	45	1	25.26	3	1	0	-2.87888	1	68.2	759.28	12.2	2.9	2.2	0.5	150	10.3	14.8	25.3	9.9	41.6	1.4	11.4	1	1	11.5	52.6	6.72727	5.10345	197.727	1.31818	68.1818	4.4	0.659091	0.246667	1.38345	0.168667	0	3.3*2.5	1	0
5	56	1	29.38	3-4	1	0	-2.96496	1	1.3	37.67	13.4	4.8	2	0.5	217	12	16.9	33.5	20.7	45.1	0.2	11.4	1	1	16.75	55.1	8.45	3.52083	520.8	2.4	108.5	4	1.2	0.1947	1.259	0.154378	1	4*2	1	1
6	57	1	24.22	2-3	1	0	-2.6711	1	692.1	115.73	15.2	5.2	2	0.4	253	23.9	18.6	84.8	13.1	40.1	1.5	11.4	1	1	42.4	50.1	9.3	3.57692	657.8	2.6	126.5	5	1.04	0.183794	0.857173	0.335178	1	5.9	2	0
7	52	1	22.5	4	1	0	-2.78998	1	6.5	46.25	13.2	2.1	1.3	0.3	86	24	21.6	30.8	13.5	41.6	4.2	11.7	1.03	2	23.6923	48.1	16.6154	10.2857	138.923	1.61538	66.1538	4.33333	0.484615	0.627907	2.66596	0.35814	0	2.3	1	1
8	52	1	25.46	2-3	0	0	-2.00573	2	37.4	19.27	13.1	1.5	0.7	0.3	53	30.6	27.6	47.2	48.7	36.7	12.1	14.4	1.28	2	67.4286	40.2	39.4286	18.4	113.571	2.14286	75.7143	2.33333	0.642857	1.30189	4.89526	0.890566	0	3.9*3.7	1	1
9	66	1	24.22	1-2	1	0	-2.73153	1	4.7	6331.36	12.6	4.1	1.3	0.4	278	30.5	29.7	106.6	10.3	40	1.6	11.3	0.99	1	82	46.5	22.8462	7.2439	876.769	3.15385	213.846	3.25	1.26154	0.267086	1.27675	0.383453	1	7.6*7.1	2	0
10	40	2	23.51	0	1	0	-2.51046	2	>1000	550.96	11.8	3.7	2.5	0.4	216	27.2	27.5	30.3	11.6	37.8	20.9	11.9	1.05	2	12.12	50.3	11	7.43243	319.68	1.48	86.4	6.25	0.592	0.318287	0.97646	0.140278	0	4.5*3.6	1	0
11	76	2	23.8	4	1	0	-2.87644	1	187.7	847.35	13.6	0.7	0.7	0.2	50	15.2	21.9	22.2	5.2	39.4	10.4	11.4	1	1	31.7143	42.9	31.2857	31.2857	50	1	71.4286	3.5	0.2	1.095	8.53819	0.444	0	3.7	1	1
12	40	1	22.24	0	1	0	-3.01892	1	964.9	8672.67	13.6	5.3	1.9	0.7	334	31.7	27.5	45.6	7.7	42.4	10.8	11.4	1	1	24	51.9	14.4737	5.18868	931.684	2.78947	175.789	2.71429	1.95263	0.205838	0.584947	0.136527	0	8.4*7.2	2	0
13	58	1	21.97	1	1	0	-2.73048	1	1.4	33.62	11.9	4.3	2.4	0.6	211	13	14.7	15	8.4	39.3	14.3	11	0.96	1	6.25	51.3	6.125	3.4186	378.042	1.79167	87.9167	4	1.075	0.174171	1.1207	0.07109	0	1.8*1.7	1	1
14	48	1	27.68	0	1	0	-2.74244	1	139.2	2028.1	13.2	2.9	2.5	0.4	232	29.8	20.8	69.9	11.5	40.5	4.7	12.4	1.09	2	27.96	53	8.32	7.17241	269.12	1.16	92.8	6.25	0.464	0.224138	0.788331	0.301293	1	7.2	2	0
15	56	2	18.26	3-4	0	0	-2.55232	2	36	291.77	15.7	3.7	1.2	0.2	87	20.1	20.8	103.2	24.4	40.8	5	13.5	1.19	2	86	46.8	17.3333	5.62162	268.25	3.08333	72.5	6	0.616667	0.597701	2.9863	1.18621	0	3.1*2	1	1
16	44	1	22.86	4	0	1	-1.85942	2	5.8	2447.55	12.7	4.8	2.4	0.6	193	21.7	29.8	204	3.5	26.1	5.8	11.8	1.04	2	85	38.1	12.4167	6.20833	386	2	80.4167	4	1.2	0.38601	1.45842	1.05699	0	7.6*7	2	0
17	58	1	27.3	3	1	0	-2.86144	1	145.9	33.06	14.2	3	1	0.4	120	18.2	23.5	25.2	11.5	41.9	7	12.2	1.07	2	25.2	46.9	23.5	7.83333	360	3	120	2.5	1.2	0.489583	2.66243	0.21	0	1.9	1	1
18	53	1	24.77	2-3	1	0	-2.96402	1	3.2	190.08	11.8	3.3	1.3	0.4	127	36	23.2	64.4	10.5	42.8	3.7	11.7	1.03	2	49.5385	49.3	17.8462	7.0303	322.385	2.53846	97.6923	3.25	1.01538	0.456693	1.61365	0.507087	0	2.1*2	1	0
19	63	1	23.24	0	0	0	-2.50732	2	971.4	407.11	11.4	3.3	1	0.4	174	25	43.5	40.9	20	39.6	3.8	11.4	1	1	40.9	44.6	43.5	13.1818	574.2	3.3	174	2.5	1.32	0.625	3.15	0.235057	0	7.3	2	0
20	65	1	20.76	4	1	0	-2.76276	1	>1000	182.12	13.3	4.3	1.7	0.4	255	25.3	24.6	135.5	10.4	40.4	3.9	11.8	1.04	2	79.7059	48.9	14.4706	5.72093	645	2.52941	150	4.25	1.01176	0.241176	1.24666	0.531373	0	2.6	1	0
21	48	2	21.9	4	1	0	-2.49961	2	1.4	2627.84	18.2	7.2	0.6	0.2	145	11.5	20.5	36.2	10.7	37.4	8.3	12.7	1.12	2	60.3333	40.4	34.1667	2.84722	1740	12	241.667	3	2.4	0.353448	2.00114	0.249655	0	4.6*3.8	1	1
22	57	1	24.98	3	1	0	-1.77958	2	10.8	532.12	14.9	1.5	1.1	0.3	37	18.6	34.9	20.8	27.4	32.1	0.9	15.6	1.39	2	18.9091	37.6	31.7273	23.2667	50.4545	1.36364	33.6364	3.66667	0.409091	2.35811	12.4664	0.562162	0	3.5	1	1
23	55	2	20.4	4	1	0	-3.18352	1	59.4	251.04	11.4	2.1	1.5	0.2	109	18.5	27.2	25.3	11.2	45.6	2.2	11.2	0.98	1	16.8667	53.1	18.1333	12.9524	152.6	1.4	72.6667	7.5	0.28	0.623853	3.19094	0.23211	1	2.5	1	1
24	55	1	29.02	1	1	0	-2.83758	1	660.9	976.06	12.2	3.5	2.1	0.3	241	17.9	19.3	22	8.5	40.6	3	11.3	0.99	1	10.4762	51.1	9.19048	5.51429	401.667	1.66667	114.762	7	0.5	0.200207	1.04106	0.0912863	0	3.8*3.5	1	0
25	64	1	21.83	0	1	0	-2.76498	1	3045.7	52.62	11.6	2.5	1.1	0.5	126	15.1	22.9	14.3	14.3	41.5	1.2	11.9	1.05	2	13	47	20.8182	9.16	286.364	2.27273	114.545	2.2	1.13636	0.454365	2.99334	0.113492	0	3.7*3	1	0
26	65	1	20.11	2	1	0	-2.70196	1	3.3	6145.98	12.7	5.7	1.3	0.5	180	29	19.9	51	16.3	41.2	1.9	11.1	0.97	1	39.2308	47.7	15.3077	3.49123	789.231	4.38462	138.462	2.6	2.19231	0.276389	1.33443	0.283333	0	3.6*3.9	1	0
27	65	1	26.78	2	1	0	-2.7309	1	1.3	15.79	12.7	3.8	1.2	0.4	265	51.5	20.5	25.7	8.9	39.5	4	11.9	1.05	2	21.4167	45.5	17.0833	5.39474	839.167	3.16667	220.833	3	1.26667	0.193396	0.700677	0.0969811	0	4.5*4.5	1	0
28	72	1	22.38	1	0	0	-2.43751	2	3	147.37	13.2	4.3	2.1	0.5	177	16.4	21.4	41.9	12.9	37.3	8.1	10.9	0.95	1	19.9524	47.8	10.1905	4.97674	362.429	2.04762	84.2857	4.2	1.02381	0.30226	2.14957	0.236723	0	7.1*4.8	2	0
29	50	1	22.5	4	1	0	-2.75646	1	<1.3	35.38	11.9	3.1	0.9	0.4	137	21.1	20.2	23.1	17.6	42.1	2.5	11.7	1.03	2	25.6667	46.6	22.4444	6.51613	471.889	3.44444	152.222	2.25	1.37778	0.368613	1.60494	0.168613	0	1.8*1.6	1	1
30	51	1	23.78	3	1	0	-2.87292	1	5.9	2806.92	13.8	1.2	0.9	0.3	53	27.7	35.9	39.8	13.2	42.5	2.1	11.8	1.04	2	44.2222	47	39.8889	29.9167	70.6667	1.33333	58.8889	3	0.4	1.6934	6.5637	0.750943	0	3.3*3.3	1	0
31	54	1	26.12	4	0	0	-2.3575	2	77.3	15.34	12.3	3	0.9	0.4	153	42.4	19.7	47.4	10	35.5	12.7	12.2	1.07	2	52.6667	40	21.8889	6.56667	510	3.33333	170	2.25	1.33333	0.321895	1.06779	0.309804	0	5.4*4.7	2	0
32	48	1	26.99	2	1	0	-2.99614	1	124.6	2823.52	12.9	4.2	1.4	0.4	159	43.9	31.6	331.9	11.9	43.6	4.5	10.8	0.95	1	237.071	50.6	22.5714	7.52381	477	3	113.571	3.5	1.2	0.496855	1.43979	2.08742	0	2.8*3.4	1	0
33	32	1	28.03	1-2	1	0	-2.9771	1	301	124.74	12.6	2.8	1.8	0.4	157	55.5	34.8	53.6	13.1	43.7	1.6	10.3	0.9	1	29.7778	52.7	19.3333	12.4286	244.222	1.55556	87.2222	4.5	0.622222	0.55414	0.952101	0.341401	0	4*4.1	1	0
34	54	1	21.88	2	0	0	-3.15239	1	43	>30000	13.2	4.9	2.5	0.5	223	32.8	80.9	57.7	17.3	46.7	8.5	10.3	0.9	1	23.08	59.2	32.36	16.5102	437.08	1.96	89.2	5	0.98	0.906951	3.42059	0.258744	0	12.1*10.6	2	1
35	66	1	22.86	2-3	0	1	-2.5313	2	16.9	310.74	12.8	2.4	0.9	0.3	74	97	101.7	532.2	9.3	37.3	2.2	10.8	0.95	1	591.333	41.8	113	42.375	197.333	2.66667	82.2222	3	0.8	3.43581	9.20974	7.19189	1	7.3*6.8	2	0
36	69	1	21.91	0	1	0	-2.80515	1	52.1	128.21	12.1	2.6	1.2	0.4	161	26.5	23	38.2	10.1	40.8	2.1	10.9	0.95	1	31.8333	46.8	19.1667	8.84615	348.833	2.16667	134.167	3	0.866667	0.357143	1.91482	0.237267	0	3.4	1	0
37	41	1	20.52	4	1	0	-2.95324	1	1059.3	765.8	13.6	3.2	1.5	0.5	147	25.4	27.4	22.1	9.4	42.3	2.1	11.9	1.05	2	14.7333	49.8	18.2667	8.5625	313.6	2.13333	98	3	1.06667	0.465986	1.51635	0.15034	0	2.2*2	1	1
38	43	1	27.68	3-4	1	0	-2.96448	1	2.3	39.86	12.5	2.9	1.6	0.3	100	49.8	27.8	57.6	5.3	40.5	1.3	13.7	1.21	2	36	48.5	17.375	9.58621	181.25	1.8125	62.5	5.33333	0.54375	0.695	1.69394	0.576	0	2.8	1	1
39	70	1	21.55	4	1	1	-2.77071	1	1085.2	23.59	12.8	2	1.7	0.4	123	36.9	43.2	39.2	7.3	39.3	2.3	11.6	1.02	2	23.0588	47.8	25.4118	21.6	144.706	1.17647	72.3529	4.25	0.470588	0.878049	4.04728	0.318699	0	1.2	1	1
40	71	1	22.04	2	1	0	-2.67098	1	2	405.98	12.7	5.7	1.1	0.6	239	42	33.7	43.5	13.5	40.2	14.5	11.2	0.98	1	39.5455	45.7	30.6364	5.91228	1238.45	5.18182	217.273	1.83333	3.10909	0.35251	1.54478	0.182008	0	4.2*4.1	1	0
41	70	1	24.22	0	0	0	-2.6393	1	6.4	431.3	13.8	5.3	2.1	0.8	345	27.9	43.7	57.5	13	39.7	6.8	10.4	0.91	1	27.381	50.2	20.8095	8.24528	870.714	2.52381	164.286	2.625	2.01905	0.316667	1.67864	0.166667	1	1.5*1.9 0.9*1.1	1	0
42	67	1	29.38	3	0	0	-2.87593	1	1.4	2244.68	12.6	2.9	1.1	0.4	130	24.8	22.7	40.6	18.1	43.6	2.8	11.3	0.99	1	36.9091	49.1	20.6364	7.82759	342.727	2.63636	118.182	2.75	1.05455	0.436538	2.34926	0.312308	0	2.9	1	1
43	83	2	21.08	2	1	0	-2.73224	1	125.6	38.76	13.2	3.1	1.1	0.3	197	11.7	17.6	19	9.4	39.7	3.9	10.8	0.95	1	17.2727	45.2	16	5.67742	555.182	2.81818	179.091	3.66667	0.845455	0.22335	2.16786	0.0964467	0	3*3.4*3.5	1	0
44	63	2	23.53	2	1	0	-2.72042	1	19.2	805.02	13	1.5	1.1	0.3	95	32.6	47.5	16.9	8.7	39.3	3.3	11.8	1.04	2	15.3636	44.8	43.1818	31.6667	129.545	1.36364	86.3636	3.66667	0.409091	1.25	5.51698	0.177895	0	5.9*3.8	2	1
45	53	1	19.47	2-3	1	0	-2.87348	1	355.6	32.63	12.4	2.3	2.3	0.4	142	31	36.5	94	14.4	42.8	3.4	11.7	1.03	2	40.8696	54.3	15.8696	15.8696	142	1	61.7391	5.75	0.4	0.642606	2.44681	0.661972	0	7.4*5.8	2	0
46	66	1	22.27	4	0	1	-2.68626	1	868	76.19	12.9	3.5	3.3	0.6	174	98.3	73.2	45.7	10.4	39.5	2.3	12.3	1.08	2	13.8485	56	22.1818	20.9143	184.545	1.06061	52.7273	5.5	0.636364	1.05172	2.80046	0.262644	0	2	1	1
47	37	1	24.15	3-4	1	0	-2.92448	1	17863.2	3113.91	12.1	2.6	1.1	0.2	166	39	34.2	100.1	14.4	43.4	3.8	12.2	1.07	2	91	48.9	31.0909	13.1538	392.364	2.36364	150.909	5.5	0.472727	0.51506	1.22064	0.603012	0	11*8.1	2	0
48	50	1	27.73	4	1	0	-2.3754	2	12.9	32.75	12.6	3.5	2.4	0.6	131	30.6	43.9	35.9	17	37.5	2.4	11.2	0.98	1	14.9583	49.5	18.2917	12.5429	191.042	1.45833	54.5833	4	0.875	0.837786	3.02902	0.274046	0	3.6*2.9	1	0
49	62	1	18.62	3	1	0	-3.02159	1	>1000	2482.08	14.1	2.6	1.8	0.5	83	48.8	53.9	108.8	17.5	45.2	2.8	11.4	1	1	60.4444	54.2	29.9444	20.7308	119.889	1.44444	46.1111	3.6	0.722222	1.62349	5.76358	1.31084	1	6	2	0
50	57	1	20.96	4	1	0	-2.91326	1	137.2	648.27	12.7	4.3	1.3	0.5	146	24	26.5	25.5	13.7	43.1	2.2	11.3	1.06	2	19.6154	49.6	20.3846	6.16279	482.923	3.30769	112.308	2.6	1.65385	0.453767	2.11185	0.174658	1	4.2*4 1.5	1	0
51	69	1	20.76	2	1	0	-3.10852	1	3.5	8101.45	13.8	3.3	2.1	0.5	104	22	31.5	170.7	10.5	44.5	2.9	11.6	1.02	2	81.2857	55	15	9.54545	163.429	1.57143	49.5238	4.2	0.785714	0.757212	4.45569	1.64135	0	8.3*7.9	2	0
52	61	2	21.08	4	1	0	-2.87101	1	<1.3	56.04	13.7	1.5	0.5	0.1	46	13	16.6	15.3	12.9	42.4	1.7	12.4	1.09	2	30.6	44.9	33.2	11.0667	138	3	92	5	0.3	0.902174	6.10532	0.332609	0	1.5*1.1	1	1
53	64	1	24.62	1-2	1	0	-2.75406	1	2931.8	8288.79	13.5	4.8	2.1	0.5	153	21.8	21.6	99.4	14	41.3	2.6	11.7	1.03	2	47.3333	51.8	10.2857	4.5	349.714	2.28571	72.8571	4.2	1.14286	0.352941	1.93515	0.649673	1	7.4*6.2	2	1
54	66	2	20.62	3	0	0	-2.6752	1	71.1	23718.7	12.9	2.8	2.3	0.3	200	15.9	26	20.6	9.6	39.1	2.5	10.9	0.95	1	8.95652	50.6	11.3043	9.28571	243.478	1.21739	86.9565	7.66667	0.365217	0.325	2.15173	0.103	0	5.2*4.1	2	0
55	76	1	26.67	0	0	0	-2.9077	1	1.3	4647.5	12.6	3.2	1.7	0.5	102	14.4	18.7	146.8	9.5	41.8	2	11.1	0.97	1	86.3529	50.3	11	5.84375	192	1.88235	60	3.4	0.941176	0.458333	3.67176	1.43922	0	4.7*4.2	1	0
56	55	2	24	3	1	0	-2.85424	1	300.9	716.17	14.6	1	0.6	0.1	52	31.5	29.2	49.8	15.4	42.8	2.4	11.3	0.99	1	83	45.8	48.6667	29.2	86.6667	1.66667	86.6667	6	0.166667	1.40385	5.50284	0.957692	1	0.7*0.6	1	1
57	43	1	26.4	1	1	0	-2.67123	1	>1000	5583.55	12.8	5.3	1.7	0.7	229	49.3	104.9	80.5	16.6	40.9	18.9	11.4	1	1	47.3529	49.4	61.7059	19.7925	713.941	3.11765	134.706	2.42857	2.18235	1.1452	2.80534	0.351528	0	9.4*7.7	2	1
58	71	1	23.39	1	1	0	-2.91326	1	4.2	42.95	12.8	2.7	1.4	0.4	146	24	26.5	48.2	13.7	43.1	2.5	11.3	0.99	1	34.4286	50.1	18.9286	9.81481	281.571	1.92857	104.286	3.5	0.771429	0.453767	2.63055	0.330137	0	1.7	1	1
59	63	1	18.81	3	1	0	-3.0677	1	2474.9	1006.05	12.8	3.5	1.4	0.4	148	17.1	16.8	32.1	14.9	45.2	2.3	10.8	0.95	1	22.9286	52.2	12	4.8	370	2.5	105.714	3.5	1	0.283784	1.72938	0.216892	0	2.6	1	1
60	40	1	26.1	1	1	0	-2.88308	1	<1.3	36.02	12.6	3.1	2.1	0.3	277	12.6	15	40.5	25.2	44.8	2.6	10.2	0.89	1	19.2857	55.3	7.14286	4.83871	408.905	1.47619	131.905	7	0.442857	0.135379	0.61022	0.146209	0	2.4*2.9	1	0
61	57	1	27.73	2	1	0	-2.9547	1	451.5	28.69	15.9	3.5	1.3	0.5	158	69.6	42.2	53.2	22.1	45.2	2.2	10.9	0.95	1	40.9231	51.7	32.4615	12.0571	425.385	2.69231	121.538	2.6	1.34615	0.667722	1.82484	0.336709	0	2*1.5	1	1
62	36	1	23.99	0	0	0	-2.9062	1	<1.3	3851.39	11.8	2.9	2	0.4	257	28.8	23.9	34.4	9	41.6	1.3	11.4	1	1	17.2	51.6	11.95	8.24138	372.65	1.45	128.5	5	0.58	0.23249	0.623837	0.133852	0	5.3*4.2	2	1
63	65	1	21.11	4	0	0	-2.15724	2	28.1	64.54	13.7	1.3	0.8	0.2	43	34.1	53.8	116.1	15.4	34.6	2.4	13.7	1.21	2	145.125	38.6	67.25	41.3846	69.875	1.625	53.75	4	0.325	3.12791	13.9268	2.7	0	2	1	1
64	53	1	22.6	1	1	0	-2.491	2	34.1	617.31	14.4	2.5	1.8	0.3	114	41.4	32	136.4	11.7	37.6	1.8	12.3	1.08	2	75.7778	46.6	17.7778	12.8	158.333	1.38889	63.3333	6	0.416667	0.701754	2.31218	1.19649	1	6*4.7	2	1
65	60	2	23.44	3-4	1	0	-2.78198	1	806.2	4024.35	12.4	2	1.1	0.2	209	23.4	25.5	16.6	14.3	41.7	1.9	11.8	1.04	2	15.0909	47.2	23.1818	12.75	380	1.81818	190	5.5	0.363636	0.305024	1.51334	0.0794258	0	3.6*2	1	0
66	72	1	26.42	0	0	0	-2.75649	1	2	82.12	12.5	2.9	2.4	0.4	229	26.1	23.3	58.2	12.7	41	4	10.2	0.89	1	24.25	53	9.70833	8.03448	276.708	1.20833	95.4167	6	0.483333	0.254367	1.43395	0.254148	0	7.6*7	2	0
67	56	2	25.68	2	1	0	-2.75744	1	3.1	128.07	13.5	2.2	2.7	0.6	194	23.3	25.4	21.2	5.2	38	1.4	10.8	0.95	1	7.85185	51.5	9.40741	11.5455	158.074	0.814815	71.8519	4.5	0.488889	0.32732	1.51895	0.109278	0	1.6	1	1
68	57	2	18.43	0	1	0	-2.16551	2	9759.1	8309.37	12.3	1.6	0.8	0.2	83	26.5	31.2	45.7	12.9	34.1	4.9	12.4	1.09	2	57.125	38.1	39	19.5	166	2	103.75	4	0.4	0.939759	4.16225	0.550602	0	9.8*9	2	0
69	56	1	23.12	3	1	0	-2.81016	1	8.3	>30000	12.2	3.5	1.3	0.3	184	63.1	45.2	79.1	7.6	39.9	35.5	13	1.15	2	60.8462	46.4	34.7692	12.9143	495.385	2.69231	141.538	4.33333	0.807692	0.61413	1.73178	0.429891	0	10.6*8.4	2	1
70	70	1	21.3	0	0	0	-2.36009	2	139.6	>30000	14.8	2	1.3	0.2	277	25.9	34.3	76.1	16.9	37.3	3.7	9.3	0.81	1	58.5385	43.8	26.3846	17.15	426.154	1.53846	213.077	6.5	0.307692	0.309567	1.70319	0.274729	0	17.4*12.9	2	0
71	51	1	22.67	4	1	0	-2.63064	1	8	9.94	12.3	3.6	1.5	0.6	173	33.8	34.6	98.8	11.9	39.3	20.9	12	1.05	2	65.8667	46.8	23.0667	9.61111	415.2	2.4	115.333	2.5	1.44	0.5	1.75445	0.571098	1	7.1*6.5	2	0
72	66	1	20.76	3-4	1	0	-2.65313	1	25.3	142.08	13.7	2.8	0.7	0.3	82	14.6	16.3	17.1	14.8	40.3	11.2	11.8	1.08	2	24.4286	43.8	23.2857	5.82143	328	4	117.143	2.33333	1.2	0.496951	3.43353	0.208537	0	3.2*3	1	0
73	79	2	25	4	1	0	-2.43774	2	58.8	36.09	13.1	3.3	1.1	0.3	131	20.2	27.7	30	15.4	37.9	1	11.9	1.09	2	27.2727	43.4	25.1818	8.39394	393	3	119.091	3.66667	0.9	0.528626	3.71672	0.229008	1	4.8*4.1 1.7	1	1
74	51	1	22.23	3	1	0	-3.00076	1	2.2	16.82	12.2	3	1.6	0.5	120	56.8	39.2	163.7	10.4	43.2	2.9	10.2	0.89	1	102.312	51.2	24.5	13.0667	225	1.875	75	3.2	0.9375	0.816667	2.21055	1.36417	0	3.1	1	0
75	72	1	28.73	1	0	0	-2.7816	1	5.8	23.47	14	3	1.4	0.4	157	15.7	22.1	23.5	13.1	41.4	0.6	11.1	0.97	1	16.7857	48.4	15.7857	7.36667	336.429	2.14286	112.143	3.5	0.857143	0.351911	2.55785	0.149682	0	6.5*5.2	2	0
76	64	1	20.8	3	1	0	-2.26956	2	2.5	135.13	13.1	5.8	1.7	1.1	141	20.2	31.3	30.8	14	35.6	92.1	12.1	1.11	2	18.1176	44.1	18.4118	5.39655	481.059	3.41176	82.9412	1.54545	3.75294	0.554965	3.16104	0.21844	0	3.8*2.8	1	0
77	51	1	22.41	4	0	0	-2.83094	1	55.7	38.01	12.2	2.6	1.5	0.3	67	22.6	16.6	39.7	25.3	44.2	1.1	10.6	0.97	1	26.4667	51.7	11.0667	6.38462	116.133	1.73333	44.6667	5	0.52	0.619403	2.65796	0.592537	0	0.8	1	1
78	64	1	16.96	3	0	0	-2.37692	2	422.4	1915.25	12.4	2.5	1.9	0.5	174	38.9	42.8	226.4	30.6	39.5	2.6	11.4	1	1	119.158	49	22.5263	17.12	228.947	1.31579	91.5789	3.8	0.657895	0.614943	2.52406	1.30115	0	3.5*3	1	0
79	55	1	27.1	0	0	0	-2.66674	1	37	200.29	12.7	4.4	2.9	0.4	322	31.1	19.4	74.7	27.1	42.5	0.2	9.7	0.85	1	25.7586	57	6.68966	4.40909	488.552	1.51724	111.034	7.25	0.606897	0.150621	0.594194	0.231988	0	8*5.1	2	0
80	45	2	20.2	3	1	0	-2.6626	1	10.5	165.44	11.6	3.5	1.5	0.3	210	18.4	19	9.6	13.1	40	1.2	11.2	1.03	2	6.4	47.5	12.6667	5.42857	490	2.33333	140	5	0.7	0.22619	0.949157	0.0457143	0	3.8*3.1	1	1
81	50	1	23.94	4	1	0	-2.82896	1	5.2	763.73	13.4	2.9	1.5	0.4	120	34.3	34.9	28.2	20.7	43.5	9.2	11.6	1.02	2	18.8	51	23.2667	12.0345	232	1.93333	80	3.75	0.773333	0.727083	2.48295	0.235	0	4.3*3.4*3.5	1	0
82	61	1	23.66	0	1	0	-2.63068	1	1195.3	64.02	12.5	3	2.1	0.3	128	15.5	21.2	14	13.8	39.8	0.7	10.8	0.95	1	6.66667	50.3	10.0952	7.06667	182.857	1.42857	60.9524	7	0.428571	0.414062	2.5662	0.109375	0	2.3*1.1	1	0
83	65	1	19.6	1	1	0	-2.08002	2	2.1	216.5	13.4	2.5	1.2	0.7	189	20.7	34.3	18.9	22.7	35	1.7	11.2	0.98	1	15.75	41	28.5833	13.72	393.75	2.08333	157.5	1.71429	1.45833	0.453704	2.59275	0.1	0	2.8*2.7	1	0
84	50	1	23.88	4	1	0	-2.59664	2	704.9	112.3	13.4	3.8	1.4	0.3	106	36.4	30.6	26.7	11.9	38.9	1.9	11.7	1.03	2	19.0714	45.9	21.8571	8.05263	287.714	2.71429	75.7143	4.66667	0.814286	0.721698	2.39241	0.251887	0	1.2*1.3	1	1
85	53	1	25.06	0	1	0	-3.03754	1	19.7	110.04	13.1	2.9	1.3	0.3	114	34.7	26.4	80.1	15.6	45	1.1	11.3	1.04	2	61.6154	51.5	20.3077	9.10345	254.308	2.23077	87.6923	4.33333	0.669231	0.578947	2.08358	0.702632	0	3.6	1	1
86	50	1	22.82	4	1	0	-2.7277	1	18.5	820.39	13.6	3.6	1.6	0.3	90	30.7	32.2	92	14.9	41.2	2.5	12.7	1.12	2	57.5	49.2	20.125	8.94444	202.5	2.25	56.25	5.33333	0.675	0.894444	3.2286	1.02222	0	3.2*2.7	1	1
87	78	2	28.04	3	0	0	-2.32948	2	128.7	11.94	12.7	1.6	1.1	0.2	76	14.3	19.3	35.9	14.4	36.4	3.6	11.3	0.99	1	32.6364	41.9	17.5455	12.0625	110.545	1.45455	69.0909	5.5	0.290909	0.634868	5.23806	0.472368	0	1.6	1	1
88	54	1	25.51	0	0	0	-2.49566	2	4.4	6255.44	13.7	3.1	1	0.5	334	12.3	21.8	66.4	4.2	34.2	19.4	11.7	1.07	2	66.4	39.2	21.8	7.03226	1035.4	3.1	334	2	1.55	0.163174	1.00497	0.198802	0	7.6*5.9*11.7	2	0
89	64	1	24.31	4	1	0	-2.43323	2	11.7	13.48	13.3	2.4	1.3	0.4	156	74.6	53.3	92.9	16.6	38.1	4.6	12.5	1.1	2	71.4615	44.6	41	22.2083	288	1.84615	120	3.25	0.738462	0.854167	2.53171	0.595513	0	1.5	1	1
90	51	1	24.73	3	1	0	-2.8159	1	1.8	26.34	12.3	5.4	2.3	0.5	176	18	23.1	19.9	8.9	40.5	0.9	10.7	0.94	1	8.65217	52	10.0435	4.27778	413.217	2.34783	76.5217	4.6	1.17391	0.328125	1.57773	0.113068	0	1.8*1.4	1	0
91	60	1	25.1	3-4	1	0	-2.87538	1	>1000	5019.55	12.1	3.2	0.7	0.4	162	38.2	40.3	55.8	4.5	38.9	6.6	11.1	0.97	1	79.7143	42.4	57.5714	12.5937	740.571	4.57143	231.429	1.75	1.82857	0.621914	2.41496	0.344444	0	9.2*7.8	2	1
92	67	1	22	1	1	0	-2.61698	1	1075.9	1972.37	11.9	2.4	0.9	0.3	148	30.7	72.5	172	6.5	37.1	3.7	10.6	0.97	1	191.111	41.6	80.5556	30.2083	394.667	2.66667	164.444	3	0.8	1.22466	5.92355	1.16216	1	13.2*9.6 6.5*6	2	0
93	74	1	21.72	1	0	0	-2.51712	2	428.9	149.64	11.6	2.6	1.4	0.4	398	24	21.5	47	5.4	35.3	12.7	11.2	0.98	1	33.5714	42.3	15.3571	8.26923	739.143	1.85714	284.286	3.5	0.742857	0.13505	0.815984	0.11809	0	3.1	1	0
94	51	1	21.05	4	1	0	-2.55644	2	2025	23.43	14	7.3	2.9	0.7	239	15.1	26.8	181.5	10.8	38.1	29.7	11.2	0.98	1	62.5862	52.6	9.24138	3.67123	601.621	2.51724	82.4138	4.14286	1.76207	0.280335	1.4717	0.759414	0	12.1	2	1
95	61	2	34.77	3	0	0	-2.80642	1	3.4	21.54	12.8	3.1	1.6	0.3	91	30.7	30.7	234.4	7.7	39.9	3.5	11.6	1.02	2	146.5	47.9	19.1875	9.90323	176.312	1.9375	56.875	5.33333	0.58125	0.843407	3.71413	2.57582	0	6.4*5.1	2	0
96	63	2	20.03	4	1	0	-2.36711	2	14.5	502.56	14.8	0.8	0.5	0.2	20	21.3	31.6	44.4	13.4	36.6	1.4	14	1.24	2	88.8	39.1	63.2	39.5	32	1.6	40	2.5	0.32	3.95	21.5679	2.22	0	3.7*2.8	1	1
97	70	1	20.52	4	1	0	-2.64932	1	29.8	151.11	12.4	2.4	1.1	0.3	106	17.3	23.8	27.7	23.4	41.8	0.3	12.6	1.16	2	25.1818	47.3	21.6364	9.91667	231.273	2.18182	96.3636	3.66667	0.654545	0.561321	3.77873	0.261321	1	3.4*1.5	1	0
98	69	2	29.3	1	1	0	-2.683	1	5531.2	88.24	13.4	3.3	1.8	0.5	154	107.4	87.8	44.2	12.2	40	15.5	10.8	0.95	1	24.5556	49	48.7778	26.6061	282.333	1.83333	85.5556	3.6	0.916667	1.42532	3.79595	0.287013	0	4.6*3.2	1	0
99	51	1	25.4	1	1	0	-2.51531	2	0.7	60.47	12.9	3.8	1.3	0.3	190	11.6	17.1	15.9	21.9	40	4.1	11.3	0.99	1	12.2308	46.5	13.1538	4.5	555.385	2.92308	146.154	4.33333	0.876923	0.225	1.34767	0.0836842	0	1.7	1	0
100	69	1	25.86	2	0	0	-2.86878	1	4.5	2219.87	13.6	2.3	1	0.3	139	44	27.7	29.1	16	43.1	2.6	11.3	0.99	1	29.1	48.1	27.7	12.0435	319.7	2.3	139	3.33333	0.69	0.498201	2.07294	0.209353	0	2.3*2.6	1	0
101	47	1	26.03	1	1	0	-3.02094	1	15.3	86.15	13.4	3.9	2.2	0.6	237	27.9	18.2	37.3	5.2	41.1	1.4	11.2	0.98	1	16.9545	52.1	8.27273	4.66667	420.136	1.77273	107.727	3.66667	1.06364	0.191983	0.683312	0.157384	0	2.1*1.7	1	0
102	64	1	23.66	1	1	0	-2.52546	2	>1000	9421.58	12.9	5.2	1.1	0.4	224	41.5	98.1	83.5	23.8	40.4	7.3	10.6	0.93	1	75.9091	45.9	89.1818	18.8654	1058.91	4.72727	203.636	2.75	1.89091	1.09487	4.35088	0.372768	1	8.7*12.9	2	0
103	38	1	24.21	3-4	1	0	-2.99851	1	3.1	164.89	12.5	3	1.6	0.3	111	38.8	28.8	29.3	12.9	43.9	4.4	11.2	0.98	1	18.3125	51.9	18	9.6	208.125	1.875	69.375	5.33333	0.5625	0.648649	1.58284	0.263964	0	4.8*3.7	1	0
104	67	1	22.04	2	1	0	-2.65534	1	2	141.75	12.7	3.3	1.5	0.4	109	19.3	23.1	31.1	28.2	42.5	3.6	10.8	0.95	1	20.7333	50	15.4	7	239.8	2.2	72.6667	3.75	0.88	0.529817	3.23208	0.285321	0	2.1*2.7	1	0
105	57	1	25.95	3	1	0	-2.8105	1	116.4	994.97	13.1	2.2	1.1	0.2	85	25.2	23	31.3	12.2	41.5	4.9	12	1.05	2	28.4545	47	20.9091	10.4545	170	2	77.2727	5.5	0.4	0.676471	3.07244	0.368235	0	2.7*2.6	1	1
106	50	2	18.29	4	1	0	-2.72366	1	679.7	>30000	14.8	2	0.5	0.2	121	21.8	70.6	37.2	7.2	38.7	3.6	11.6	1.02	2	74.4	41.2	141.2	35.3	484	4	242	2.5	0.8	1.45868	6.24829	0.307438	0	6.8*8.2	2	0
107	69	1	21.97	0	0	0	-2.8518	1	92.9	187.6	12.8	3.6	1.2	0.4	194	10.7	17.8	14.7	13	42.2	2.2	10.7	0.94	1	12.25	48.2	14.8333	4.94444	582	3	161.667	3	1.2	0.229381	1.93542	0.0757732	0	1.6	1	0
108	48	2	23.44	3	1	0	-2.378	2	16.7	20.03	12.3	2.9	2.2	0.4	213	11.1	18.3	31.1	22	38.4	6.3	11.8	1.08	2	14.1364	49.4	8.31818	6.31034	280.773	1.31818	96.8182	5.5	0.527273	0.214789	1.2378	0.146009	0	1.5*1.3	1	0
109	45	2	22.96	1	1	0	-2.8537	1	7510	813.98	13.3	4	1.7	0.4	176	35.2	38.8	61.1	9.6	41.2	4.6	10.9	1	1	35.9412	49.7	22.8235	9.7	414.118	2.35294	103.529	4.25	0.941176	0.551136	1.67209	0.347159	0	11.6*7.5	2	1
110	67	1	23.88	0	0	0	-2.78124	1	706.4	4883.74	12.8	3.7	1.6	0.4	174	43.1	31.2	44.9	12	41.1	2.9	11.5	1.01	2	28.0625	49.1	19.5	8.43243	402.375	2.3125	108.75	4	0.925	0.448276	1.82996	0.258046	0	7.6*7.5	2	0
111	70	1	25.71	3	1	0	-2.40671	2	76	147.89	13.1	2.7	1.4	0.3	139	10.8	14.6	18.2	37.1	40.5	4.3	12	1.05	2	13	47.5	10.4286	5.40741	268.071	1.92857	99.2857	4.66667	0.578571	0.26259	2.2373	0.130935	0	3.3*2.6	1	1
112	55	1	23.66	3	1	0	-2.80896	1	198.6	510.25	12.7	4.2	2.2	0.4	120	50.4	33.6	54.7	16.5	42.5	3.1	10.5	0.92	1	24.8636	53.5	15.2727	8	229.091	1.90909	54.5455	5.5	0.763636	0.7	2.16923	0.455833	0	2.6*2.0	1	1
113	72	2	23.37	4	1	0	-2.71738	1	8.7	164.96	13.7	3.9	1.1	0.4	179	10.7	21.9	30.8	9.9	39.7	29.7	10.9	0.95	1	28	45.2	19.9091	5.61538	634.636	3.54545	162.727	2.75	1.41818	0.305866	2.69297	0.172067	0	3.4	1	0
114	59	1	27.55	4	0	0	-2.23128	2	4.9	19.88	18.3	1.3	0.7	0.2	83	23.3	42.1	79.6	16	35.6	2.5	14.3	1.27	2	113.714	39.1	60.1429	32.3846	154.143	1.85714	118.571	3.5	0.371429	1.26807	6.19981	0.959036	0	3.6*3.6	1	1
115	52	1	22.58	1	1	0	-2.87841	1	196	193.09	12.3	3.9	1.8	0.5	187	27.3	25.5	37.3	8.3	41	1.9	11	0.96	1	20.7222	50	14.1667	6.53846	405.167	2.16667	103.889	3.6	1.08333	0.340909	1.35713	0.199465	0	1.6*1.1	1	0
116	82	1	22.86	1	0	0	-2.83844	1	4.6	724.21	15.9	4.3	1.2	0.2	198	8	15.5	25.6	6.3	39.6	6.2	10.5	0.96	1	21.3333	45.6	12.9167	3.60465	709.5	3.58333	165	6	0.716667	0.195707	2.26953	0.129293	0	7.5*6.4	2	0
117	73	1	22.5	1	1	0	-2.83984	1	5.9	32.49	13.1	2	2.9	0.4	226	24	23.3	115.2	17.7	43.1	3.9	10.8	0.99	1	39.7241	57.6	8.03448	11.65	155.862	0.689655	77.931	7.25	0.275862	0.257743	1.53626	0.509735	1	3.1*2.7	1	1
118	42	1	22.89	3	1	0	-2.86308	1	2.1	31.3	11.9	2.3	1	0.2	85	25.1	22.5	14.6	8.5	40.9	0.5	11.4	1.05	2	14.6	45.9	22.5	9.78261	195.5	2.3	85	5	0.46	0.661765	2.2191	0.171765	0	1.2	1	1
119	54	1	25.09	2	1	0	-2.57152	2	1	3612.4	13	3	1.5	0.3	89	20.7	30.6	28.9	18	40	3.5	11	0.96	1	19.2667	47.5	20.4	10.2	178	2	59.3333	5	0.6	0.859551	4.08075	0.324719	0	5.8*5.1	2	0
120	68	1	27.73		1	0	-2.67314	1	82.9	9241.46	13.1	3.1	1.2	0.5	141	55.3	52.3	101.8	11.9	39.8	20.2	12.1	1.06	2	84.8333	45.8	43.5833	16.871	364.25	2.58333	117.5	2.4	1.29167	0.927305	3.39179	0.721986	0	10.2*9.2	2	1
121	62	1	26.3	4	1	0	-2.4825	2	535.4	74.49	13.3	0.8	0.8	0.1	60	17.9	27	38	11.7	37.5	2.7	12.4	1.14	2	47.5	41.5	33.75	33.75	60	1	75	8	0.1	1.125	6.59444	0.633333	1	3*2.5	1	1
122	57	1	22.65	0	0	0	-2.96688	1	>1000	1625.72	12.9	3.2	1.9	0.3	236	25.5	21.1	30.7	8.2	42	2	10.2	0.89	1	16.1579	51.5	11.1053	6.59375	397.474	1.68421	124.211	6.33333	0.505263	0.223517	1.0092	0.130085	0	2.5*2.9	1	0
123	57	2	33.53	4	1	0	-2.13778	2	4.3	37.88	13.3	3.3	1.4	0.4	128	30.4	37.6	56.6	16	34.5	3.5	12.4	1.09	2	40.4286	41.5	26.8571	11.3939	301.714	2.35714	91.4286	3.5	0.942857	0.734375	3.0368	0.442188	0	3.5*3.1	1	1
124	47	1	23.88	2	0	0	-2.93499	1	222	176.12	13.3	3.6	2.6	0.5	204	19.3	18.1	25.2	16.1	43.9	2.4	10.3	0.9	1	9.69231	56.9	6.96154	5.02778	282.462	1.38462	78.4615	5.2	0.692308	0.221814	0.949222	0.123529	0	2.6*1.6	1	0
125	79	1	27.68	4	1	0	-2.73742	1	<1.3	1023.4	12.1	3	1.3	0.3	150	13.9	13.8	15.6	8.7	39.5	1.8	11.8	1.04	2	12	46	10.6154	4.6	346.154	2.30769	115.385	4.33333	0.692308	0.23	1.94943	0.104	1	5.3*5.4 2.6*2.1	2	0
126	65	1	19.94	3	1	0	-2.74606	1	>1000	4554.39	14.3	3	1	0.4	109	31.3	29.4	39.6	18.8	42.2	2.3	11.7	1.03	2	39.6	47.2	29.4	9.8	327	3	109	2.5	1.2	0.674312	3.13373	0.363303	1	4.5*4.2	1	1
127	51	1	23.01	2-3	0	1	-2.50401	2	1.5	25.65	12.8	3	1.5	0.3	136	43.4	26.2	45.4	24.9	40.3	2.1	10.7	0.94	1	30.2667	47.8	17.4667	8.73333	272	2	90.6667	5	0.6	0.481618	1.49138	0.333824	0	1.9*1.6	1	1
128	70	1	22.04	4	1	0	-2.9164	1	<1.3	63.99	17.7	5.7	1.8	0.5	245	17.7	14.1	28.4	3.9	38.9	14.8	10.6	0.93	1	15.7778	47.9	7.83333	2.47368	775.833	3.16667	136.111	3.6	1.58333	0.143878	0.957557	0.115918	0	4.4*3.4	1	1
129	42	1	26	4	1	0	-2.78252	1	12.1	44.38	12.4	2.4	1.7	0.3	165	70.9	35.2	56.2	19.2	42.7	2.3	11	0.96	1	33.0588	51.2	20.7059	14.6667	232.941	1.41176	97.0588	5.66667	0.423529	0.533333	1.06411	0.340606	1	1.2*0.9	1	1
130	72	2	21.56	0	0	0	-2.90726	1	<1.3	73.96	12.5	2.6	1.2	0.3	135	22.2	20.9	23.1	10.4	42.1	2.8	11.9	1.05	2	19.25	48.1	17.4167	8.03846	292.5	2.16667	112.5	4	0.65	0.387037	2.36575	0.171111	0	1.4*1.1	1	0
131	53	2	25.97	4	0	0	-2.49299	2	3	>30000	12.9	3.9	1.8	0.2	146	48	48.7	329.5	16.1	38.7	8.4	9.7	0.85	1	183.056	47.7	27.0556	12.4872	316.333	2.16667	81.1111	9	0.433333	0.833904	2.55171	2.25685	0	8.3*5.8	2	1
132	64	1	23.73	1	0	0	-2.51238	2	88.2	249.91	12.2	3.8	1.4	0.7	192	23.8	25.6	66.5	15.5	38.8	5.1	10.6	0.93	1	47.5	45.8	18.2857	6.73684	521.143	2.71429	137.143	2	1.9	0.333333	1.74916	0.346354	1	3.4*2.5	1	0
133	59	1	25.71	3	1	0	-2.08876	2	141	8.86	13.6	1.3	0.8	0.2	29	25.1	35.2	69.6	13.7	33.4	2.7	16.2	1.44	2	87	37.4	44	27.0769	47.125	1.625	36.25	4	0.325	3.03448	14.2942	2.4	0	2*1.4	1	1
134	48	1	28.91	4	1	0	-1.7491	2	50.8	138.21	13.3	2.7	2.1	0.7	77	42.9	64.1	31	43.5	33.3	1.9	13.1	1.2	2	14.7619	43.8	30.5238	23.7407	99	1.28571	36.6667	3	0.9	2.08117	6.1007	0.402597	0	2.3	1	1
135	55	2	21.43	1	1	0	-2.83676	1	5.3	264.85	12.6	2.3	1.9	0.4	198	13.3	17.9	17.1	13.7	42.2	2	11.3	0.99	1	9	51.7	9.42105	7.78261	239.684	1.21053	104.211	4.75	0.484211	0.22601	1.3634	0.0863636	0	3.8*2.4	1	0
136	71	2	18.18	1	0	0	-2.44034	2	6124.9	797.75	12.8	2.1	1.2	0.2	201	31.1	67	260.3	12.4	37.2	4.6	10.8	0.95	1	216.917	43.2	55.8333	31.9048	351.75	1.75	167.5	6	0.35	0.833333	4.24382	1.29502	0	10.4*8.1	2	0
137	67	1	21.51	0	1	0	-2.4707	2	1.7	30.55	12.5	4.5	2.1	0.4	137	27	16.2	36.8	16.4	38.5	1	10.9	0.95	1	17.5238	49	7.71429	3.6	293.571	2.14286	65.2381	5.25	0.857143	0.29562	1.52471	0.268613	0	3*2.4	1	0
138	68	1	23.74	0	1	0	-2.80294	1	<1.3	1265.39	13	3.9	2.5	0.3	210	25.8	28.8	19.1	10.8	41	3.3	10.2	0.89	1	7.64	53.5	11.52	7.38462	327.6	1.56	84	8.33333	0.468	0.342857	1.836	0.0909524	0	8.7*7.8	2	0
139	50	1	29.4	2	0	0	-3.00628	1	9	191.1	12.1	2.3	1.4	0.3	145	92.7	42.1	45.1	15	44.5	4.1	11.2	0.98	1	32.2143	51.5	30.0714	18.3043	238.214	1.64286	103.571	4.66667	0.492857	0.725862	1.5078	0.311034	1	4.4*3.6	1	0
140	72	1	25.01	1	0	0	-2.65496	1	22.2	4516.46	13	2.9	1.1	0.4	171	26.1	21.8	36.3	11.6	39.5	8.4	11	0.96	1	33	45	19.8182	7.51724	450.818	2.63636	155.455	2.75	1.05455	0.318713	1.79669	0.212281	0	6.6*4	2	0
141	57	1	24.8	0	0	0	-2.86712	1	45.8	169.72	13.2	1.9	1.7	0.4	158	27.3	24	43.2	5.7	39.6	4.3	10.5	0.92	1	25.4118	48.1	14.1176	12.6316	176.588	1.11765	92.9412	4.25	0.447059	0.379747	1.6571	0.273418	1	8.9*6	2	0
142	66	2	20.4	3-4	0	0	-2.58521	2	29.9	21.66	11.8	1.7	1	0.3	161	14.7	21.9	15.7	15.7	39.7	4.8	10.8	0.95	1	15.7	44.7	21.9	12.8824	273.7	1.7	161	3.33333	0.51	0.340062	2.34155	0.0975155	0		1	0
143	68	1	20.24	1	0	0	-3.02896	1	>1000	999.33	12.7	3.3	1.3	0.2	162	12	19.1	19.3	11.6	43.9	3.9	10.1	0.88	1	14.8462	50.4	14.6923	5.78788	411.231	2.53846	124.615	6.5	0.507692	0.294753	2.31439	0.119136	0	5.1*7.8	2	0
144	68	1	23.39	2	0	0	-2.82186	1	2.1	1920.62	12.8	2.3	1.6	0.3	197	13.5	17.8	36.2	13.6	42	4.8	10.7	0.94	1	22.625	50	11.125	7.73913	283.187	1.4375	123.125	5.33333	0.43125	0.225888	1.67223	0.183756	0	7.6*7.6	2	0
145	54	2	22.31	4	1	0	-2.82676	1	22.8	29.52	12.6	2.6	1.1	0.3	85	34.9	43.8	36.6	12.6	41.8	5.7	13.1	1.16	2	33.2727	47.3	39.8182	16.8462	200.909	2.36364	77.2727	3.66667	0.709091	1.28824	4.71017	0.430588	0	1.5	1	1
146	51	1	22.14	3	1	0	-2.86846	1	11	113.38	12.3	3.8	1.4	0.5	187	36.7	28.5	286.1	16.5	43.2	18.1	13.9	1.28	2	204.357	50.2	20.3571	7.5	507.571	2.71429	133.571	2.8	1.35714	0.381016	1.28304	1.52995	0	6.4*6.1	2	0
147	64	1	17.84	1	0	0	-2.69794	1	8.3	1042.65	11.6	4.2	1.2	0.4	153	59	51.4	76	5.2	37.3	23.3	11.8	1.08	2	63.3333	43.3	42.8333	12.2381	535.5	3.5	127.5	3	1.4	0.839869	2.79915	0.496732	0	3	1	1
148	56	1	23.66	4	0	1	-2.41038	2	41.7	47.51	12.7	1.4	1.5	0.2	50	100.6	71.5	111.3	15.5	37.6	3.2	11.6	1.02	2	74.2	45.1	47.6667	51.0714	46.6667	0.933333	33.3333	7.5	0.186667	3.575	7.98408	2.226	1	2.5*2.4 0.7	1	1
149	59	1	25.35	3	1	0	-2.69256	1	>1000	1874.89	12.6	3.3	1.4	0.5	173	42.6	49	122.5	11.8	40	7.7	11.1	0.97	1	87.5	47	35	14.8485	407.786	2.35714	123.571	2.8	1.17857	0.708092	2.56034	0.708092	1	7.3	2	1
150	45	1	25.83	4	1	0	-2.732	1	862.9	966.98	12.6	2.1	1.6	0.3	102	21.1	19.2	34	24.3	42.9	3.2	10.8	0.99	1	21.25	50.9	12	9.14286	133.875	1.3125	63.75	5.33333	0.39375	0.470588	1.84405	0.333333	0	2.3*2.4	1	0
151	49	1	24.24	2	1	0	-2.78786	1	3.5	24.74	13.1	5.8	1.8	0.4	189	19.1	17	21.6	13.6	41.6	5.9	11.2	0.98	1	12	50.6	9.44444	2.93103	609	3.22222	105	4.5	1.28889	0.224868	1.00848	0.114286	0	1	1	0
152	54	1	23.44	3	1	0	-2.62698	1	7.8	127.54	12.8	3.6	2.2	0.4	162	21.8	16	48	14.4	39.9	4.4	10.7	0.94	1	21.8182	41.9	40	7.27273	891	5.5	405	5.5	0.654545	0.246914	1.14227	0.296296	0	2	1	0
153	65	1	23.18	1	1	0	-2.93296	1	1.3	356.18	12.9	5	1.9	0.5	202	18.5	15.3	45.4	7.5	41.3	7.2	10.9	0.95	1	23.8947	43.8	30.6	8.05263	767.6	3.8	404	3.8	1.31579	0.189356	1.14464	0.224752	1	2.2*2.4	1	1
154	77	1	22.86	0	0	0	-2.54039	2	24.5	680.13	11.9	3.7	2	0.6	212	12.5	22.7	28.6	17.3	39.5	0.9	10.6	0.93	1	14.3	42.5	37.8333	11.35	706.667	3.33333	353.333	3.33333	1.11	0.267689	2.33198	0.134906	0	3.5*2.5	1	0
155	67	1	27.74	0	1	0	-2.8071	1	2.1	32.54	12.5	4.4	2	0.5	267	13.4	23.4	48.5	13.1	41.7	9.4	10.4	0.95	1	24.25	44.2	46.8	11.7	1068	4	534	4	1.1	0.219101	1.60408	0.181648	0	1.9	1	0
156	53	1	18.59	4	1	0	-3.33218	1	121.5	41.85	12.4	3.8	3.8	0.6	279	17.5	32.9	55.1	6.1	45.3	1.5	10.6	0.93	1	14.5	48.3	54.8333	8.65789	1767	6.33333	465	6.33333	0.6	0.294803	1.49399	0.197491	0	1.9*1.6	1	1
157	56	1	23.03	4	1	0	-2.51202	2	663.1	820.58	12	2.4	1.7	0.5	146	25.3	33.2	52.6	11.2	37.7	3.2	11.7	1.03	2	30.9412	40.2	66.4	19.5294	496.4	3.4	292	3.4	0.705882	0.568493	2.5317	0.360274	0	3.9	1	1
158	56	2	21.78	2	0	0	-2.68401	1	220.9	2669.73	13.1	1.8	0.8	0.2	66	22.2	32.4	52.8	12.9	40.2	1.6	11.6	1.02	2	66	41.2	162	40.5	264	4	330	4	0.45	1.22727	5.83462	0.8	1	7.8*4	2	1
159	68	1	24.51	1	0	0	-2.83664	1	10.7	12.63	13.1	5.1	1.8	0.6	374	21.3	16.7	24	5.8	39.3	34.2	11.5	1.01	2	13.3333	42.3	27.8333	9.27778	1122	3	623.333	3	1.7	0.111631	0.657906	0.0641711	0	2.5*2.3	1	0
160	43	1	25.69	4	1	0	-2.04283	2	65.3	17.72	12.6	2.7	2.6	0.9	144	19.2	28.3	34.2	29.1	35.4	2.3	11.6	1.02	2	13.1538	39.9	31.4444	10.8846	416	2.88889	160	2.88889	0.934615	0.491319	1.9286	0.2375	1	5.5	2	1
161	50	1	30.68	4	1	0	-3.24061	1	>1000	278.56	12.7	4.1	2.4	0.3	173	37.7	26.7	84.1	13.9	47	2.2	11.6	1.02	2	35.0417	48.5	89	11.125	1384	8	576.667	8	0.5125	0.385838	1.2568	0.486127	0	2.1	1	0
162	49	1	24.02	3	1	0	-2.6767	1	155.2	30.5	12.6	1.6	1.5	0.3	38	33.8	24.7	45.7	14.9	40.6	2.3	12.3	1.08	2	30.4667	42.1	82.3333	16.4667	190	5	126.667	5	0.32	1.625	5.47837	1.20263	0	1.5	1	1
163	62	1	20.76	3	1	0	-3.00424	1	52.4	41.61	12	2.3	1.4	0.3	197	16.2	16.3	27	9.4	42.9	2.1	10.6	0.93	1	19.2857	44.4	54.3333	11.6429	919.333	4.66667	656.667	4.66667	0.492857	0.206853	1.27455	0.137056	0	1.2*1	1	1
164	69	1	18.38	1	0	1	-2.04411	2	5.8	86.84	12.8	1.1	0.9	0.2	93	109.3	74.6	149.1	13.4	32.8	2	11.6	1.02	2	165.667	33.8	373	82.8889	418.5	4.5	465	4.5	0.244444	2.00538	5.29413	1.60323	0	3.8*4.6	1	1
165	55	1	29	3	1	0	-2.75002	1	3116.5	455.27	12.8	5.2	1.6	0.4	133	59.4	38.8	36.2	11.2	40.5	2.6	11	0.96	1	22.625	42.5	97	24.25	532	4	332.5	4	1.3	0.729323	2.08185	0.27218	0	3.7	1	0
166	53	1	21.55	1-2	1	0	-2.92415	1	4058	487.26	12.4	2.1	1.8	0.3	150	12.6	19.4	26.6	10.1	42.2	1.5	11.2	0.98	1	14.7778	43.7	64.6667	10.7778	900	6	500	6	0.35	0.323333	1.93108	0.177333	1	3*2.5	1	0
167	70	1	26.4	2	1	0	-2.3792	2	6241.9	369.41	14.7	6.1	1.6	0.9	279	9.3	22.7	61.3	14.9	37.1	111.1	13.1	1.16	2	38.3125	41.6	25.2222	14.1875	496	1.77778	310	1.77778	3.43125	0.203405	1.86758	0.219713	0	9.5*7.4	2	0
168	55	1	25.43	4	1	0	-2.77403	1	110.2	34.77	12	2.9	1.9	0.3	160	22.9	19.7	21.8	10.3	40.5	1.9	11.4	1	1	11.4737	42	65.6667	10.3684	1013.33	6.33333	533.333	6.33333	0.457895	0.307812	1.41511	0.13625	0	2*2	1	0
169	42	1	27.31	4	1	0	-2.61254	1	7.5	4980.84	13.9	2.9	1	0.5	102	25.4	34.1	91	15.6	40	30.8	12.1	1.06	2	91	42.5	68.2	34.1	204	2	204	2	1.45	0.835784	2.78604	0.892157	0	6.6*3.7	2	0
170	63	1	24.2	4	1	0	-2.81468	1	395.1	2271.5	13.5	2.7	1.8	0.5	120	117.6	81.6	87.8	11	41.2	4.8	11.8	1.04	2	48.7778	43.7	163.2	45.3333	432	3.6	240	3.6	0.75	1.7	3.95044	0.731667	0	5.4*4.4	2	0
171	74	1	20.02	2-3	0	1	-2.37694	2	9.2	45.9	12.4	2.6	1.2	0.4	77	31.3	69.9	89.8	11.5	36.2	1.7	11.7	1.03	2	74.8333	38.2	174.75	58.25	231	3	192.5	3	0.866667	2.26948	12.0073	1.16623	0	4.5	1	0
172	62	2	27.5	3	1	0	-2.36882	2	2.8	480	13.1	1.6	1.4	0.4	119	24.5	23.5	18.7	10.2	35.7	2.3	12.4	1.09	2	13.3571	37.7	58.75	16.7857	416.5	3.5	297.5	3.5	0.457143	0.493697	2.4736	0.157143	0	3.7*4	1	0
173	64	2	20.96	4	1	0	-2.13724	2	179.4	34.9	12.3	1.5	1.3	0.4	149	29.3	30.6	24.4	9.4	32.7	1.6	11.3	0.99	1	18.7692	34.7	76.5	23.5385	484.25	3.25	372.5	3.25	0.461538	0.513423	2.42818	0.163758	0	3	1	1
174	54	1	22.65	4	1	0	-1.9747	2	124.4	778.16	13.2	3.3	1.2	0.3	131	103.7	46.5	464.9	19.8	33.3	3.3	12	1.05	2	387.417	34.8	155	38.75	524	4	436.667	4	0.825	0.887405	1.88229	3.54885	0	4.3*2.9	1	1
175	51	1	22.31	1	0	0	-2.8845	1	2.4	530.67	13.5	3.1	2	0.4	173	27.6	25.9	30.5	10	41.7	1.4	9.9	0.86	1	15.25	43.7	64.75	12.95	865	5	432.5	5	0.62	0.374277	1.45335	0.176301	0	7.2*6.8	2	0
176	55	1	24.16	4	1	0	-2.76109	1	556.8	6650.14	13.1	2.5	1.7	0.4	109	37	38.4	54	11.1	40.6	2.4	11.2	0.98	1	31.7647	42.6	96	22.5882	463.25	4.25	272.5	4.25	0.588235	0.880734	3.18542	0.495413	0	8*7.6	2	0
177	28	1	19.6	3-4	1	0	-2.86015	1	242.7	326.81	12.9	2	1.4	0.3	120	30.5	25.5	21.9	19.7	43.7	2.1	12.2	1.07	2	15.6429	45.2	85	18.2143	560	4.66667	400	4.66667	0.428571	0.53125	1.07738	0.1825	0	3	1	0
178	50	1	23.14	3-4	1	0	-2.70146	1	7.8	29.01	14.3	2.4	0.7	0.3	139	23.2	34.9	20.9	20.7	42	15.3	11.9	1.05	2	29.8571	43.5	116.333	49.8571	324.333	2.33333	463.333	2.33333	1.02857	0.627698	2.60637	0.15036	0	6.6*5	2	1
179	55	1	21.05	4	0	0	-2.75152	1	52.4	20.77	12.5	1.9	1.1	0.3	105	11.9	16.1	16	19	42.3	1.7	11.9	1.05	2	14.5455	43.8	53.6667	14.6364	385	3.66667	350	3.66667	0.518182	0.383333	2.4447	0.152381	0	1.6	1	0
180	44	1	22.44	4	1	0	-2.76958	1	314.4	23.19	12.4	1.6	0.9	0.2	85	19	21	20.2	19.5	42.6	1.7	12.1	1.06	2	22.4444	43.6	105	23.3333	382.5	4.5	425	4.5	0.355556	0.617647	2.49388	0.237647	0	2	1	1
181	68	1	18.04	3-4	1	0	-2.76279	1	54.9	380.64	12.2	3.4	1.8	0.6	200	18	18.8	44.5	9.8	40.2	4.4	11.3	0.99	1	24.7222	43.2	31.3333	10.4444	600	3	333.333	3	1.13333	0.235	1.50661	0.2225	1	3.4	1	0
182	48	1	22.3	4	1	0	-2.7613	1	65.8	115.44	11.6	3.4	1.4	0.4	183	24.5	23	28.8	44.7	45.3	4.3	12.7	1.12	2	20.5714	47.3	57.5	16.4286	640.5	3.5	457.5	3.5	0.971429	0.314208	1.21881	0.157377	0	2.4	1	1
183	79	1	18.69	3	1	0	-2.29572	2	>1000	23638.2	13.5	2.8	1	0.4	177	45.3	61	128.6	16.2	36.4	4.6	11.1	0.97	1	128.6	38.4	152.5	61	442.5	2.5	442.5	2.5	1.12	0.861582	4.04515	0.726554	1	9.5*9*8.6	2	0
184	38	1	20.79	3-4	1	0	-2.38323	2	76.8	19539.1	13.4	7.1	1.7	0.5	282	43.7	62.1	168.2	9.7	35.7	121.4	12.5	1.1	2	98.9412	38.2	124.2	36.5294	958.8	3.4	564	3.4	2.08824	0.550532	1.26586	0.596454	1	15.1*10.7	2	0
185	45	1	21.46	1	1	0	-2.43753	2	3.7	9668.45	13.9	2.5	0.9	0.2	84	58.7	128.5	235.8	31.4	40.3	4.3	11.3	0.99	1	262	41.3	642.5	142.778	378	4.5	420	4.5	0.555556	3.8244	8.98498	2.80714	0	13	2	0
186	57	1	22.04	4	1	0	-2.30087	2	12.6	66.59	13.8	2.2	0.9	0.4	82	24	23.5	95.5	24.1	37.8	6.6	12.5	1.1	2	106.111	39.8	58.75	26.1111	184.5	2.25	205	2.25	0.977778	0.716463	3.33444	1.16463	0	2.2*2.3	1	1
187	53	1	30.12	0	0	0	-2.81041	1	94.9	14150.9	12.8	4.5	1.7	0.7	183	16.8	25.7	68.6	8.3	40.2	4.2	10.5	0.85	1	40.3529	43.7	36.7143	15.1176	444.429	2.42857	261.429	2.42857	1.85294	0.351093	1.81595	0.374863	0	10.2*7.8	2	0
188	40	1	24.06	3	1	0	-3.1272	1	22.7	1093.04	12.1	5.2	2.2	0.5	267	49.6	32.2	124.7	5.6	42.6	3.8	10.7	0.94	1	56.6818	45.1	64.4	14.6364	1174.8	4.4	534	4.4	1.18182	0.301498	0.684958	0.467041	1	7.2	2	0
189	46	1	20.94	3-4	1	0	-2.70992	1	>1000	4942.92	13.5	3.5	1.8	0.3	255	31.9	40.5	51.3	4.7	37.1	3.7	11.7	0.95	1	28.5	38.6	135	22.5	1530	6	850	6	0.583333	0.397059	1.29353	0.201176	0	5.5*4.7	2	0
190	38	1	21.41	1	1	0	-2.86673	1	23.5	7331.59	12.5	3.6	1.4	0.3	201	37.9	24.8	25.3	16.6	43.2	1.7	11	0.96	1	18.0714	44.7	82.6667	17.7143	938	4.66667	670	4.66667	0.771429	0.308458	0.761587	0.125871	0	6	2	0
191	50	1	25.26	3-4	0	0	-2.55246	2	>1000	59.11	12.1	5.2	1.8	0.6	171	32.1	21.9	76.1	17.6	39.7	5.1	11.3	0.91	1	42.2778	42.7	36.5	12.1667	513	3	285	3	1.73333	0.320175	1.13023	0.445029	0	1.6	1	0
192	67	1	23.88	0	0	0	-2.69052	1	>1000	>30000	12.6	3.5	1.5	0.4	155	36.3	50	73.7	11.2	39.8	5.7	11.6	0.94	1	49.1333	41.8	125	33.3333	581.25	3.75	387.5	3.75	0.933333	0.806452	3.58723	0.475484	0	7.1*7	2	1
193	71	1	21.01	2	1	0	-2.9509	1	88.4	222.18	11.6	3.1	1.5	0.2	159	9.8	15.8	35.4	9.2	42.2	4.3	11	0.89	1	23.6	43.2	79	10.5333	1192.5	7.5	795	7.5	0.413333	0.248428	2.25375	0.222642	0	2.4	1	0
194	70	1	26.4	1	1	0	-2.24092	2	>1000	4881.4	12.3	5.1	0.9	0.5	170	18.3	27.4	45.9	30.6	37.9	125.4	13.4	1.09	2	51	40.4	54.8	30.4444	306	1.8	340	1.8	2.83333	0.402941	2.63739	0.27	0	11.8*7.3	2	0
195	46	2	22.89	3	1	0	-3.24962	1	303.6	93	12.2	3.2	1.8	0.2	117	25.4	23.3	38.8	5.7	44.1	3.3	10.5	0.92	1	21.5556	45.1	116.5	12.9444	1053	9	585	9	0.355556	0.497863	1.81765	0.331624	0	2.3*1.8	1	0
196	68	2	23.81	3	0	0	-2.38084	2	19.8	16505.5	13.6	2.4	0.8	0.5	93	45	32.7	72.7	12.4	36.5	2.5	11.5	1.01	2	90.875	39	65.4	40.875	148.8	1.6	186	1.6	1.5	0.879032	3.56424	0.78172	0	4.7*4.1	1	1
197	83	1	23.44	1	0	0	-2.75959	1	2.2	222.29	13.3	3.4	1.4	0.4	234	26.4	31.1	153.8	16.9	42	4.1	10.5	0.92	1	109.857	44	77.75	22.2143	819	3.5	585	3.5	0.971429	0.332265	2.14694	0.657265	0	8.8	2	0
198	52	2	19.92	4	1	0	-3.01223	1	231.1	18.16	12	3.3	1.4	0.3	156	27.6	22.7	20.8	9.7	43.1	3.1	11.2	0.98	1	14.8571	44.6	75.6667	16.2143	728	4.66667	520	4.66667	0.707143	0.363782	1.44029	0.133333	1	1.4	1	1
199	63	1	28.03	3	1	0	-2.75742	1	5.7	99.65	12.4	2.1	1.7	0.5	125	42.1	30.9	62.2	6.4	38.7	4.2	11.5	1.01	2	36.5882	41.2	61.8	18.1765	425	3.4	250	3.4	0.617647	0.618	2.4002	0.4976	0	4.4*4.6	1	0
200	67	1	24.61	0	1	0	-2.87861	1	<1.3	22.48	13.2	3.9	1.6	0.4	142	23.7	19.5	27.8	19.6	43.9	7.1	10.4	0.91	1	17.375	45.9	48.75	12.1875	568	4	355	4	0.975	0.34331	1.88994	0.195775	0	1.8	1	0
201	59	1	29.8	2	1	0	-2.51846	2	<1.3	2707.42	13.1	3.3	2	0.4	368	48.3	40.5	156.2	17.6	39.3	3.9	11	0.96	1	78.1	41.3	101.25	20.25	1840	5	920	5	0.66	0.275136	0.934298	0.424457	0	13.3*10.2	2	0
202	76	1	23.03	3	1	0	-2.46358	2	33.6	157.06	12.8	2.5	1	0.3	101	28.5	29	53.9	19.5	39	2	11.8	1.04	2	53.9	40.5	96.6667	29	336.667	3.33333	336.667	3.33333	0.75	0.717822	4.08759	0.533663	1	5.4*4.2	2	1
203	85	2	26.67	1	1	0	-3.08579	1	814.3	270.02	12.8	3.6	2.1	0.5	201	28	27	33.4	9.8	44	5	10.7	0.94	1	15.9048	46.5	54	12.8571	844.2	4.2	402	4.2	0.857143	0.335821	2.15778	0.166169	0	4.2	1	0
204	82	1	24.61	2	1	0	-2.65178	1	10	16086.1	12.7	4.2	0.8	0.4	156	37.3	26.5	60.7	23.2	41.8	5.1	11.1	0.97	1	75.875	43.8	66.25	33.125	312	2	390	2	2.1	0.424679	2.28077	0.389103	0	8.6*7.7	2	0
205	43	2	21.67	1	1	0	-2.39353	2	>1000	11972.3	14.3	1.9	1.2	0.2	205	22.9	28.6	113	14.6	37.2	2.8	11.2	0.98	1	94.1667	38.2	143	23.8333	1230	6	1025	6	0.316667	0.34878	1.25361	0.55122	1	7.3*5.7	2	0
206	59	1	32.08	2	0	0	-3.24586	1	578	94.6	14.1	3	1.9	0.4	220	33	30.1	61.1	6.9	44.7	3	10.8	0.94	1	32.1579	46.7	75.25	15.8421	1045	4.75	550	4.75	0.631579	0.342045	1.4052	0.277727	0	4.5*3.3	1	0
207	45	1	21.3	4	1	0	-2.48104	2	47.4	5399.13	12	4	0.9	0.6	127	9.3	33.9	112.3	18.9	39.1	82.1	11.9	1.05	2	124.778	42.1	56.5	37.6667	190.5	1.5	211.667	1.5	2.66667	0.667323	3.93883	0.884252	0	7	2	1
208	49	2	27.34	4	1	0	-2.66465	1	9.2	17.95	17.7	1.4	0.6	0.1	68	13.6	18.6	16.8	19.7	41.4	3.1	13.3	1.18	2	28	41.9	186	31	408	6	680	6	0.233333	0.683824	3.63438	0.247059	0	5.3*5.1	2	1
209	57	1	26.12	1	1	0	-2.93186	1	26	15984.1	13.5	3.2	1.2	0.3	221	38.6	95.2	79.2	12.1	42.9	5.8	11.1	0.97	1	66	44.4	317.333	79.3333	884	4	736.667	4	0.8	1.07692	3.95208	0.358371	0	7.2*7	2	0
210	51	1	20.02	3	1	0	-2.89303	1	15.4	2705.62	13.6	3.3	2.3	0.4	133	32.5	27.1	32.4	10.3	41.9	4	11.8	1.04	2	14.087	43.9	67.75	11.7826	764.75	5.75	332.5	5.75	0.573913	0.509398	1.82283	0.243609	0	6.1*5.2	2	0
211	55	1	28.2	3	1	0	-2.62762	1	8.3	24493.8	12.2	2.8	1.4	0.3	91	78.4	52.7	79.6	26	41.9	5.2	11.8	1.04	2	56.8571	48.9	37.6429	18.8214	182	2	65	4.66667	0.6	1.4478	3.59728	0.874725	0	7.3*6.3	2	0
212	49	1	18.4	1	1	0	-2.86852	1	4.2	138.06	13.8	4.5	1.6	0.5	103	16.3	19.9	51.4	6.2	39.9	2.6	11.6	1.02	2	32.125	47.9	12.4375	4.42222	289.688	2.8125	64.375	3.2	1.40625	0.48301	2.34487	0.499029	0	3.8*3.2	1	0
213	75	2	23.8	1	0	0	-2.75831	1	4.7	21.66	11.8	3.2	1.9	0.4	234	16.1	16.2	27.4	7.4	39.2	1.3	10.1	0.88	1	14.4211	48.7	8.52632	5.0625	394.105	1.68421	123.158	4.75	0.673684	0.173077	1.29404	0.117094	0	2.5*2.2	1	0
214	66	1	22.66	4	0	1	-2.778	1	15.4	26.87	12.7	3.4	3	0.5	121	16.6	29.6	86.7	14.5	41.7	1.9	11	0.96	1	28.9	56.7	9.86667	8.70588	137.133	1.13333	40.3333	6	0.566667	0.61157	3.96275	0.716529	0	2.9	1	1
215	68	1	22.41	1	1	0	-2.71373	1	152.5	12267.2	13.8	4.9	2	0.4	164	12.9	21.7	38.7	16.6	41.4	5.2	11.3	0.99	1	19.35	51.4	10.85	4.42857	401.8	2.45	82	5	0.98	0.330793	2.50513	0.235976	0	6.6*5.1	2	0
216	55	2	29.34	4	0	1	-1.97094	2	43.6	120.13	12.3	0.7	0.8	0.2	34	12.5	33.2	236.9	31.3	34.8	3.7	13	1.15	2	296.125	38.8	41.5	47.4286	29.75	0.875	42.5	4	0.175	2.44118	15.1903	6.96765	0	5*5.6*4	2	1
217	70	1	20.9	3	1	0	-2.0945	2	4.1	12923	12.9	2.8	1	0.5	70	20.7	23.2	65.1	24.3	35.4	43.1	13.1	1.16	2	65.1	40.4	23.2	8.28571	196	2.8	70	2	1.4	0.828571	5.09921	0.93	1	7.2*6.8	2	1
218	73	1	25.35	2	1	0	-2.88042	1	3.5	131.11	12.4	3.1	1.4	0.3	202	19.6	20.4	57.6	26.2	44.9	4.6	10.9	0.95	1	41.1429	51.9	14.5714	6.58065	447.286	2.21429	144.286	4.66667	0.664286	0.252475	1.66523	0.285149	0	7.1*7.7	2	0
219	36	1	20.24	4	1	0	-2.89832	1	>1000	2006.28	13.4	2	0.9	0.2	76	26.9	24.8	37.6	20	44.2	4.5	12.1	1.07	2	41.7778	48.7	27.5556	12.4	168.889	2.22222	84.4444	4.5	0.444444	0.815789	2.26498	0.494737	0	3	1	1
220	57	1	20.42	1	1	0	-2.85366	1	<1.3	19.58	12.7	3.5	2	0.4	147	9.9	18.8	12.4	24.8	44.4	0.5	11.6	1.02	2	6.2	54.4	9.4	5.37143	257.25	1.75	73.5	5	0.7	0.319728	2.31685	0.0843537	0	2.3*1.6	1	0
221	56	1	20.76	4	1	0	-2.52233	2	95.6	451.08	13.2	0.9	0.4	0.1	42	29.3	29.6	36.4	26.3	40.7	3.2	13.5	1.2	2	91	42.7	74	32.8889	94.5	2.25	105	4	0.225	1.7619	7.29116	0.866667	1	4.2*2.6	1	1
222	66	1	24.49	2	0	0	-2.88156	1	3.1	2108.13	12.9	4	1.7	0.5	226	15.8	16.9	51.8	14	42.8	2.4	10.6	0.93	1	30.4706	51.3	9.94118	4.225	531.765	2.35294	132.941	3.4	1.17647	0.186947	1.24163	0.229204	0	6.2*4.6	2	0
223	50	2	25.27	4	1	0	-2.58648	2	>1000	60.64	13.1	3.2	1.5	0.4	200	32.6	41.6	32.6	14.3	39.4	2.2	11.4	1	1	21.7333	46.9	27.7333	13	426.667	2.13333	133.333	3.75	0.853333	0.52	1.82148	0.163	0	5.4*4.9	2	0
224	58	1	27.55	4	1	0	-1.86201	2	64.3	40.75	14	1.3	1.1	0.2	62	35.4	39.6	31.2	16.7	31.4	1.8	12.9	1.14	2	28.3636	36.9	36	30.4615	73.2727	1.18182	56.3636	5.5	0.236364	1.59677	6.2263	0.503226	0	3.3*2.6	1	1
225	83	1	18.52	1	0	0	-2.75026	1	2.8	7747.49	13.3	1.5	1.6	0.3	123	15.2	21.9	19.1	12.6	40.9	1.5	11.6	1.02	2	11.9375	48.9	13.6875	14.6	115.312	0.9375	76.875	5.33333	0.28125	0.445122	3.79049	0.155285	0	6	2	0
226	72	2	27.73	4	0	0	-2.37347	2	5.5	22.22	13.1	2.1	1.5	0.4	110	19	26.3	93.2	11.3	36.1	22.2	11.9	1.05	2	62.1333	43.6	17.5333	12.5238	154	1.4	73.3333	3.75	0.56	0.597727	3.94929	0.847273	0	3.5	1	1
227	72	1	23.15	2	1	0	-2.75429	1	485.5	4701.75	12.9	2.9	1.4	0.3	173	14.5	23.6	45.4	9.8	40.1	2.3	11.2	0.98	1	32.4286	47.1	16.8571	8.13793	358.357	2.07143	123.571	4.66667	0.621429	0.34104	2.57937	0.262428	1	6.2*4	2	1
228	75	1	25.95	4	0	0	-2.74302	1	<1.3	26.85	13.3	3.4	1.9	0.3	153	18	21.9	49.9	10.5	40.2	6.7	11.6	1.02	2	26.2632	49.7	11.5263	6.44118	273.789	1.78947	80.5263	6.33333	0.536842	0.357843	2.53033	0.326144	0	5.3*5	2	0
229	53	2	24.8	3	1	0	-2.9339	1	79.8	18.98	13.1	3.2	2.2	0.2	126	30.4	25.6	20.4	9.2	42	1.5	11.5	1.01	2	9.27273	53	11.6364	8	183.273	1.45455	57.2727	11	0.290909	0.507937	1.95303	0.161905	0	1.4*1.4	1	0
230	52	1	18.47	3	1	0	-2.84416	1	388.7	327.93	13.5	4.1	1.2	0.3	160	42.7	39.1	61.6	7.6	40.3	3.3	10.9	0.95	1	51.3333	46.3	32.5833	9.53659	546.667	3.41667	133.333	4	1.025	0.610938	1.94467	0.385	0	3.6*2.8	1	1
231	65	1	24.51	3-4	1	0	-2.53351	2	8.4	29.78	13.1	4.1	1.4	0.3	107	22.5	32.6	30.7	16.7	39.3	7.4	12	1.05	2	21.9286	46.3	23.2857	7.95122	313.357	2.92857	76.4286	4.66667	0.878571	0.761682	4.17499	0.286916	1	2.5*2.1 2.3*1.8	1	0
232	54	1	20.28	4	1	0	-2.86571	1	3.9	95.74	14.8	3.3	0.8	0.2	60	51	35.8	61.3	15.7	43	1.3	11.6	1.02	2	76.625	47	44.75	10.8485	247.5	4.125	75	4	0.825	1.49167	4.5117	1.02167	0	8.6*7.6	2	1
233	80	1	18.94	3-4	1	0	-1.97596	2	>1000	164.12	13.1	1.7	0.8	0.2	61	39	45.8	89.8	16.5	32.7	3.1	13.3	1.18	2	112.25	36.7	57.25	26.9412	129.625	2.125	76.25	4	0.425	1.87705	9.61819	1.47213	0	4.5*5	2	1
234	70	1	28.58	0	0	0	-2.56559	2	59.9	606.56	13.8	3.8	0.7	0.4	212	19.7	18.1	55.2	11.1	38.3	55	11.8	1.04	2	78.8571	41.8	25.8571	4.76316	1150.86	5.42857	302.857	1.75	2.17143	0.213443	1.3465	0.260377	0	12.3*10.1	2	0
235	70	1	18.1	3	1	0	-3.05492	1	1.3	253.46	14.7	2.1	2.5	0.5	176	19.6	36.9	54.8	6.4	42.2	2.5	10.7	0.94	1	21.92	54.7	14.76	17.5714	147.84	0.84	70.4	5	0.42	0.524148	3.315	0.311364	0	4.9*3.7	1	0
236	76	1	22.86	3	1	0	-2.76392	1	29.8	298.73	12.9	4.3	1.5	0.4	204	23.6	24.6	23.8	7.7	39.4	2.5	11.3	0.99	1	15.8667	46.9	16.4	5.72093	584.8	2.86667	136	3.75	1.14667	0.301471	1.88652	0.116667	0	4*2.8	1	0
237	51	1	22.86	3	1	0	-2.57351	2	>1000	>30000	13.4	2.4	0.8	0.2	99	36.3	43.1	179.3	12.9	38.9	2.3	12.7	1.12	2	224.125	42.9	53.875	17.9583	297	3	123.75	4	0.6	1.08838	3.68518	1.81111	0	3.2	1	1
238	57	2	22.38	4	1	0	-2.85586	1	52.7	27.14	13	4.5	1.4	0.4	229	40.8	47.4	27.2	13.6	42.4	2.1	10.9	0.95	1	19.4286	49.4	33.8571	10.5333	736.071	3.21429	163.571	3.5	1.28571	0.517467	1.84709	0.118777	0	2.3	1	0
239	68	1	22.82	0	1	0	-2.14104	2	1.6	73.11	12	3.5	1.7	0.5	216	12.7	23.1	25.7	18.9	35.1	1.9	12.5	1.1	2	15.1176	43.6	13.5882	6.6	444.706	2.05882	127.059	3.4	1.02941	0.267361	2.04063	0.118981	0	2.4	1	1
240	60	2	>24	2	1	0	-2.4579	2	112.6	19.65	12.7	3.6	1.3	0.3	192	24.3	24.6	42.9	9.2	36.4	3.4	12.3	1.08	2	33	42.9	18.9231	6.83333	531.692	2.76923	147.692	4.33333	0.830769	0.320312	1.55949	0.223437	0	1.3*1	1	1
